# Supplementary material for: Complex stability and dynamic subunit interchange modulates the disparate activities of the yeast moonlighting proteins Hal3 and Vhs3
Source: PubMed Central journal article supplement (PMC4626798; doi:10.1038/srep15774), 2015-10-30
Supplement: srep15774-s1.pdf [file srep15774-s1.pdf]

# Complex stability and dynamic subunit interchange modulates the disparate activities of the yeast moonlighting proteins Hal3 and Vhs3

J. Albert Abrie<sup>1</sup>, Cristina Molero<sup>2</sup>, Joaquín Ariño<sup>2</sup> and Erick Strauss<sup>1\*</sup>

<sup>1</sup>Department of Biochemistry, Stellenbosch University, South Africa

<sup>2</sup>Institut de Biotecnologia i Biomedicina and Departament de Bioquímica i Biologia Molecular, Universitat Autònoma de Barcelona, Spain

## SUPPLEMENTARY INFORMATION

### Supplementary Table S1: List of oligonucleotides

| Oligonucleotide name           | Utilization                                                  | Sequence                                     |
|--------------------------------|--------------------------------------------------------------|----------------------------------------------|
| 5'-Vhs3CoaC                    | Construction of pET28a-Vhs3-PD                               | 5'-GGATCCAAGGCTTCATATGGATGACGGCAAGC-3'       |
| 3'-Vhs3CoaC                    | Construction of pET28a-Vhs3-PD                               | 5'-CATCCTCTTCTTCCTCGAGTCACGCAGAAACATCG-3'    |
| 5'-Ykl088wCoaC                 | Construction of pET28a-Cab3-PD                               | 5'-GAGTTCCTTTTCAGCATATGGACGACAAGAAATTC-3'    |
| 3'-Ykl088wCoaC                 | Construction of pET28a-Cab3-PD                               | 5'-CTTGCTCTTTATCTCGAGTTTCTCAGTCCCTAGCTTTC-3' |
| pDuet_PPZ1 <sup>Cter</sup> -5a | Construction of pET-Duet1 Ppz1 <sup>Cter</sup> _Hal3 (MCS 1) | 5'-TTGGCGCGCCTGATAATGCAATCTTCCGGAA-3'        |
| pDuet_PPZ1_T1-3                | Construction of pET-Duet1 Ppz1 <sup>Cter</sup> _Hal3 (MCS 1) | 5'-GGGAAGCTTCAATACACACGCGAAG-3'              |
| pDuet_Hal3_5                   | Construction of pET-Duet1 Ppz1 <sup>Cter</sup> _Hal3 (MCS 2) | 5'-GCAAGATCTGACTGCCGTCGCCTCTACT-3            |
| pDuet_Hal3_3                   | Construction of pET-Duet1 Ppz1 <sup>Cter</sup> _Hal3 (MCS 2) | 5'-CCGCTCGAGTTATTGATGCTTATCTATT-3            |

### Supplementary Table S2: List of plasmids

| Plasmid                                                | Utilization                                                            | Origin/ Reference |
|--------------------------------------------------------|------------------------------------------------------------------------|-------------------|
| pENTR4T-Hal3 <sup>PD</sup>                             | Construction of pETDuet-1_Hal3 <sup>PD</sup> _Cab3 <sup>PD</sup>       | This work         |
| pENTR4T-Vhs3 <sup>PD</sup>                             | Construction of pETDuet-1_Vhs3 <sup>PD</sup> _Cab3 <sup>PD</sup>       | This work         |
| pET28a-Cab3 <sup>PD</sup>                              | Attempted expression of 6xHis-Cab3 <sup>PD</sup>                       | This work         |
| pET28a-Hal3 <sup>PD</sup>                              | Expression of 6xHis-Hal3 <sup>PD</sup>                                 | Ref. 1            |
| pET28a-Vhs3 <sup>PD</sup>                              | Expression of 6xHis-Vhs3 <sup>PD</sup>                                 | This work         |
| pET28a-Vhs3 <sup>PD_H459A</sup>                        | Expression of 6xHis-Vhs3 <sup>PD_H459A</sup>                           | This work         |
| pETDuet-1_Cab3 <sup>PD</sup> (MCS2)                    | Construction of pETDuet-1 plasmids                                     | This work         |
| pETDuet-1_Hal3 <sup>PD</sup> _Cab3 <sup>PD</sup>       | Co-expression of 6xHis-Hal3 <sup>PD</sup> and Cab3 <sup>PD</sup>       | This work         |
| pETDuet-1_Hal3 <sup>PD_H378A</sup> _Cab3 <sup>PD</sup> | Expression of 6xHis-Hal3 <sup>PD_H378A</sup> and Cab3 <sup>PD</sup>    | This work         |
| pETDuet-1_Vhs3 <sup>PD</sup> _Cab3 <sup>PD</sup>       | Co-expression of 6xHis-Vhs3 <sup>PD</sup> and Cab3 <sup>PD</sup>       | This work         |
| pPROEX-Hta-HsCoaC                                      | Expression of 6xHis-HsCoaC                                             | Ref. 2            |
| pGEX6P1-Hal3                                           | Expression of GST-Hal3/Construction of pET28a-Hal3 <sup>PD</sup>       | Ref. 3            |
| pGEX6P1-Vhs3                                           | Construction of pET28a-Vhs3 <sup>PD</sup>                              | Ref. 3            |
| pGEX6P1-Ykl088w                                        | Construction of pET28a-Cab3 <sup>PD</sup>                              | Ref. 4            |
| pGEX6P1-Hal3_H378A                                     | Construction of pETDuet-1_Hal3 <sup>PD_H378A</sup> _Cab3 <sup>PD</sup> | Ref. 4            |
| pGEX6P1-Vhs3_H459A                                     | Construction of pET28a-Vhs3 <sup>PD_H459A</sup>                        | Ref. 4            |
| pGEX6P1-Ppz1 <sup>Cter</sup>                           | Expression of GST-Ppz1( $\Delta$ 1-344)                                | Ref. 3            |
| pETDuet-1_Ppz1 <sup>Cter</sup> _Hal3                   | Co-expression of 6xHis-Ppz1 <sup>Cter</sup> and Hal3                   | This work         |

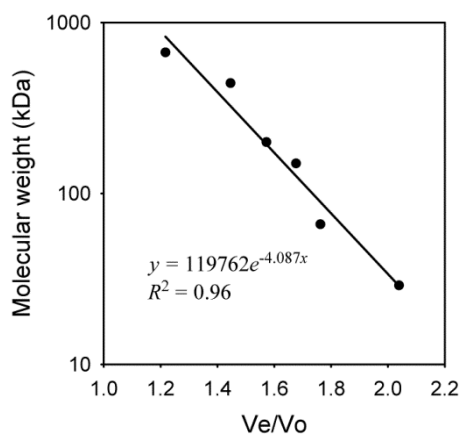

**Supplementary Fig. S1. SEC calibration curve.** Calibration curve used to determine the size of the protein and complex peaks in the SEC elution profiles shown in Figure 4b–f.

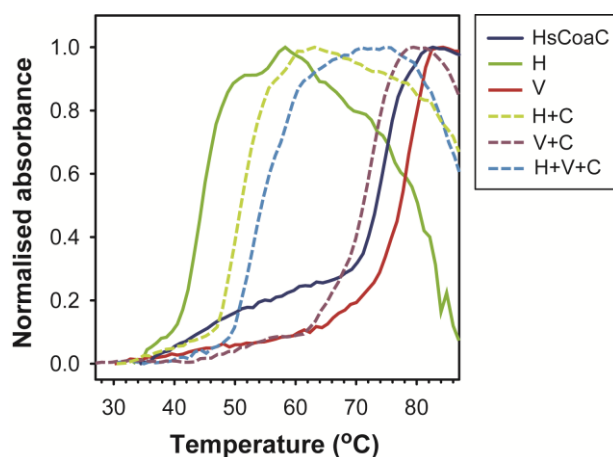

**Supplementary Fig. S2. Heat-induced changes in the PD proteins' absorbance at 222 nm.** Normalised absorbance data collected simultaneously with the circular dichroism data shown in Figure 6a.

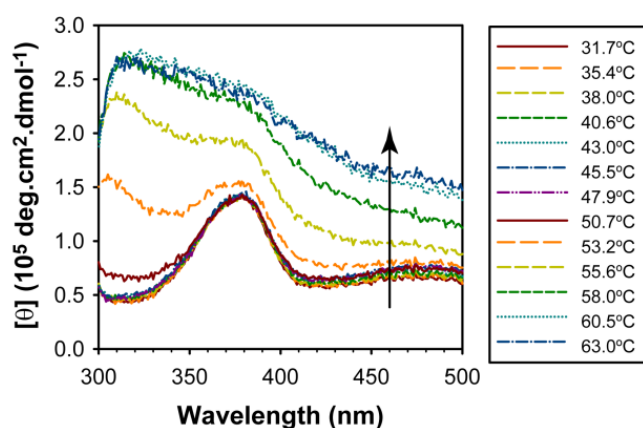

**Supplementary Fig. S3. Typical changes in the visible CD spectra of the PD proteins observed as a function of temperature.** CD spectra of the Hal3<sup>PD</sup>/Vhs3<sup>PD</sup>/Cab3<sup>PD</sup> complex obtained at increasing temperatures (as indicated by the arrow), with the legend next to the figure indicating the temperature at which the respective spectra were obtained.

## References

- 1 Abrie, J. A., González, A., Strauss, E & Ariño, J. Functional mapping of the disparate activities of the yeast moonlighting protein Hal3. *Biochem. J.* **442**, 357-368 (2012).
- 2 Daugherty, M., Polanuyer, B., Farrell, M., Scholle, M., Lykidis, A., de Crecy-Lagard, V. & Osterman, A. Complete reconstitution of the human coenzyme A biosynthetic pathway via comparative genomics. *J. Biol. Chem.* **277**, 21431-21431 (2002).
- 3 Ruiz, A., Munoz, I., Serrano, R., Gonzalez, A., Simon, E. & Arino, J. Functional Characterization of the *Saccharomyces cerevisiae* VHS3 Gene. *J. Biol. Chem.* **279**, 34421-34421 (2004).
- 4 Ruiz, A., Gonzalez, A., Munoz, I., Serrano, R., Abrie, J. A., Strauss, E. & Arino, J. Moonlighting proteins Hal3 and Vhs3 form a heteromeric PPCDC with Ykl088w in yeast CoA biosynthesis. *Nat. Chem. Biol.* **5**, 920-928 (2009).
